# Supplementary material
Source: publisher site journal article supplement (https://www.spandidos-publications.com/8373/downloadSupplementary)
Supplement: Supplementary file 1 [file downloadSupplementary]

## Sheet: Sheet1
Table SIII. Top 10 genes from each of the six topological network algorithms.
MCC	MNC	Degree	EPC	Closeness	Radiality
IL6	IL6	IL6	IL6	IL6	IL6
ALB	ALB	ALB	ALB	ALB	ALB
HP	JAK2	JAK2	HP	JAK2	APOA1
A2M	APOA1	APOA1	APOA1	APOA1	SERPINA1
SERPINA1	HP	SERPINA1	CP	SERPINA1	JAK2
ORM1	A2M	HP	JAK2	HP	HP
APOA1	CP	A2M	SERPINA1	CP	CP
LTF	SERPINA1	CP	LTF	A2M	A2M
CP	STAT1	STAT1	ORM1	LTF	LTF
CLU	LTF	LTF	A2M	STAT1	CLU
